# Supplementary material for: Mechanisms and scenarios of the unprecedent flooding event in South Brazil 2024
Source: Copernicus journal article supplement (doi:10.5194/egusphere-2025-1285), 2025-05-09
Supplement: Supplementary file 1 [file egusphere-2025-1285-supplement.pdf]

## Supplementary Material

**Table S1.** Gauge (upstream) and Tide (downstream) stations description. The stations were used to define the boundary conditions of the 2D hydrodynamic model.

| Boundary condition | Section        | Gauge/Tide station           | Source   | Longitude | Latitude |
|--------------------|----------------|------------------------------|----------|-----------|----------|
| Upstream           | Taquari River  | Estrela (86879300)           | ANA      | -51.962   | -29.473  |
|                    | Jacuí River    | Rio Pardo (85900000)         | ANA      | -52.375   | -29.995  |
|                    | Caí River      | Barca do Caí (87170000)      | ANA      | -51.383   | -29.590  |
|                    | Gravataí River | Passo das Canoas (87399000)  | ANA      | -50.977   | -29.964  |
|                    | Sinos River    | Campo Bom (87380000)         | ANA      | -51.046   | -29.691  |
|                    | Camaquã        | Passo do Mendonça (87905000) | ANA      | -52.052   | -31.011  |
| Downstream         | Patos lagoon   | Rio Grande 2                 | SIMCosta | -52.094   | -32.167  |

**Table S2.** Manning's roughness coefficient ( $n$ ) used for the main channel and floodplains regions for each main river in the Patos lagoon basin.

| Manning region | Main channel | Floodplain |
|----------------|--------------|------------|
| Taquari River  | 0.030        | 0.11       |
| Jacuí River    | 0.035        | 0.06       |
| Guaíba River   | 0.035        | 0.08       |
| Sinos River    | 0.020        | 0.12       |
| Gravataí River | 0.025        | 0.10       |
| Caí River      | 0.035        | 0.30       |
| Patos Lagoon   | 0.025        | 0.08       |

**Table S3.** Gauge station used for calibration of the model as well as its location.

| Gauge station                  | Section        | Longitude | Latitude |
|--------------------------------|----------------|-----------|----------|
| Bom Retiro Montante (86881000) | Taquari River  | -51.951   | -29.608  |
| Taquari (86950000)             |                | -51.876   | -29.806  |
| Porto Mariante (86895000)      |                | -51.970   | -29.692  |
| São Jerônimo (87035000)        | Jacuí River    | -51.696   | -29.941  |
| Corsan (87401750)              | Gravataí River | -51.036   | -29.968  |
| Passo Montenegro (87270000)    | Caí River      | -51.441   | -29.701  |
| São Leopoldo (87382000)        | Sinos River    | -51.148   | -29.758  |
| Cais Mauá (87450004)           | Guaíba River   | -51.241   | -30.034  |
| CatSul – Guaíba (87242000)     |                | -51.311   | -30.107  |

|                              |              |         |         |
|------------------------------|--------------|---------|---------|
| São Lourenço (87921000)      | Patos Lagoon | -51.958 | -31.377 |
| Laranjal (87955000)          |              | -52.225 | -31.772 |
| Rio Grande - FURG (87991100) |              | -52.101 | -32.027 |

*Note.* After May 2, gauge station 87450004 was damaged by the flood and was temporarily replaced by a new gauge (87444000), located 2 km downstream.
